# Supplementary material for: Management of Exciton Distribution for High-Performance Organic Light-Emitting Diodes Based on Interfacial Exciplex Architecture
Source: MDPI journal article supplement (doi:10.3390/molecules28207028), 2023-10-11
Supplement: s1 [file s1]

# Management of Exciton Distribution for High-Performance Organic Light-Emitting Diodes Based on Interfacial Exciplex Architecture

Ren Sheng <sup>1,†</sup>, Cong Chen <sup>1,†</sup>, Erdong Zhang <sup>1</sup>, Wencheng Zhao <sup>1</sup>, Jihua Tang <sup>1</sup>, Duxu Yan <sup>1</sup>, Zhengze Li <sup>2</sup> and Ping Chen <sup>1,\*</sup>

- <sup>1</sup> Institute of Physics and Electronic Information, Yantai University, Yantai 264005, China; rensheng@ytu.edu.cn (R.S.); congchen@s.ytu.edu.cn (C.C.); erdongzhang@s.ytu.edu.cn (E.Z.); 18265892850@163.com (W.Z.); fanhuokua111@126.com (J.T.); yandx316@s.ytu.edu.cn (D.Y.)
- <sup>2</sup> State Key Laboratory on Integrated Optoelectronics, College of Electronic Science & Engineering, Jilin University, Changchun 130012, China; 13091682837@163.com
- \* Correspondence: pingchen@jlu.edu.cn; Tel.: +86-1360-431-2567
- † These authors contributed equally to this work.

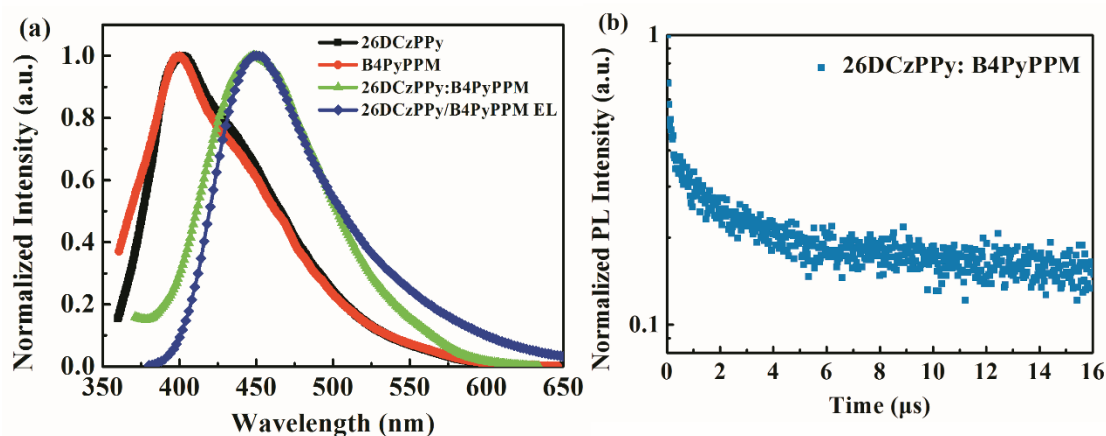

**Figure S1.** (a) The normalized PL spectra of 26DCzPPy, B4PyPPM and 26DCzPPy: B4PyPPM mixed film and the normalized EL spectra of 26DCzPPy: B4PyPPM 26DCzPPy/B4PyPPM bilayer devices. (b) The transient PL decay of 26DCzPPy: B4PyPPM mixed film measured at 300 K.

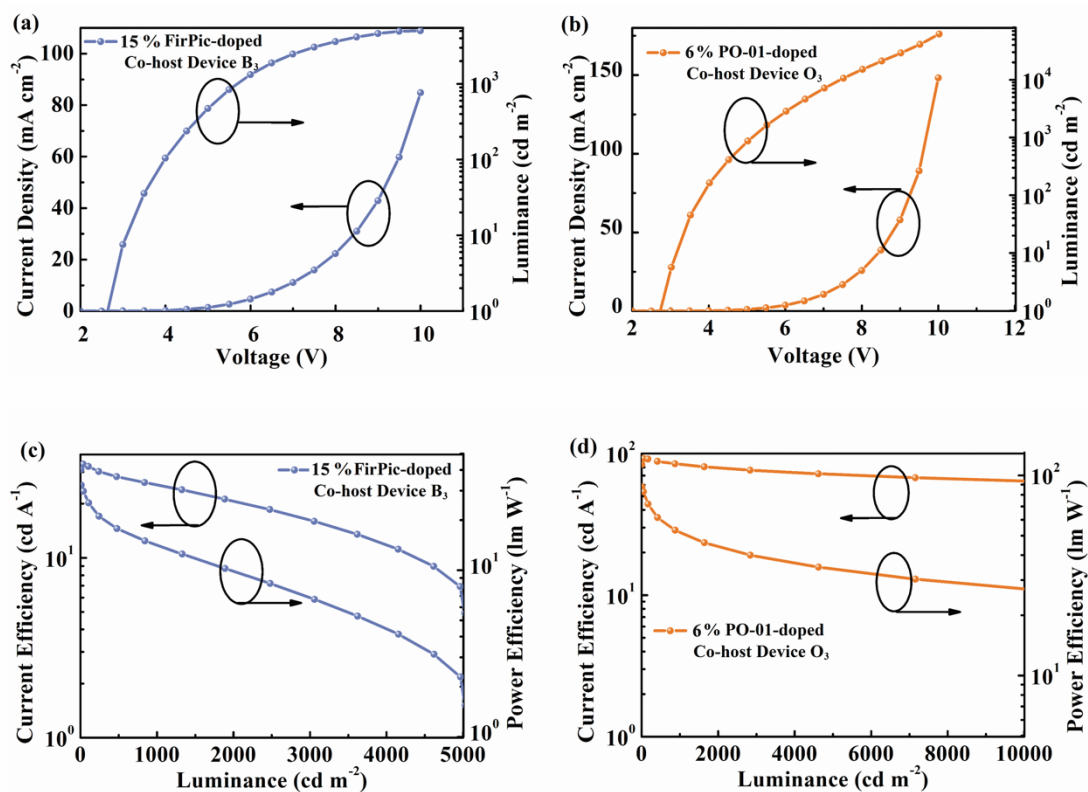

**Figure S2.** The current density-voltage-luminance characteristics of (a) blue and (b) orange co-host devices. The current efficiency-luminance-power efficiency characteristics of (c) blue and (d) orange co-host devices.
